# Supplementary material for: Chromites in ordinary-chondrite fusion crusts
Source: Copernicus journal article supplement (doi:10.5194/ejm-37-617-2025), 2025-09-10
Supplement: Supplementary file 1 [file ejm-37-617-2025-supplement.zip]

## Sheet: ABA PANU L3.6
Name	Fe	Mg	Mn	Ni	Cr	Al	Ti	V	sum A	sum B	Mg#	Al#	Fe3+/Fetot	TiO2 wt%	Type	Num
2577	0.893832	0.346975			1.62218	0.0901542	0.0468565		1.24081	1.75919	0.279637	0.0526498	0.269409	1.78427	interior	1
3405	0.397007	0.239186			2.16671	0.00420856	0.0981997	0.0946925	0.636194	2.36381	0.375965	0.00193861	0	3.59943	interior	2
3406	0.396096	0.227325			2.13617	0.045465	0.0991963	0.095752	0.623421	2.37658	0.364641	0.0208399	0	3.64604	interior	3
3407	0.40323	0.232961			2.12087	0.049157	0.109713	0.0840655	0.636191	2.36381	0.366181	0.0226527	0	4.03758	interior	4
3408	0.394386	0.241404			2.11088	0.0596491	0.10807	0.085614	0.635789	2.36421	0.379691	0.0274814	0	3.98696	interior	5
3409	0.400366	0.263254			2.0128	0.0884369	0.143282	0.0918647	0.66362	2.33638	0.396694	0.0420881	0	5.32024	interior	6
3410	0.387707	0.259406			2.13484	0.0385604	0.099556	0.0799252	0.647114	2.35289	0.400867	0.0177419	0	3.6748	interior	7
3411	0.391671	0.253393			2.12822	0.0512401	0.0975667	0.077913	0.645063	2.35494	0.392818	0.0235105	0	3.60344	interior	8
3412	0.401216	0.253215			2.10919	0.0596212	0.0939911	0.0827683	0.654431	2.34557	0.386924	0.0274903	0	3.4756	interior	9
3494	0.746086	0.284547			1.59973	0.32403	0.0306331	0.0149762	1.03063	1.96937	0.27609	0.168436	0.0410584	1.18392	interior	10
3499	0.744953	0.288022			1.18977	0.760431	0.0148048	0.00201884	1.03297	1.96703	0.278827	0.389924	0.0442638	0.604598	interior	11
3500	0.714635	0.264235			1.2778	0.714635	0.018016	0.0106762	0.97887	2.02113	0.269939	0.358674	0	0.727835	interior	12
3502	0.646727	0.356208			1.01512	0.958239	0.0176072	0.00609481	1.00293	1.99707	0.355165	0.485587	0.00453752	0.745593	interior	13
3504	0.78255	0.248932			1.60693	0.310996	0.045199	0.0053969	1.03148	1.96852	0.241334	0.162153	0.0402299	1.73418	interior	14
3505	0.805044	0.209271			1.64894	0.271984	0.0483981	0.0163599	1.01431	1.98569	0.206317	0.14159	0.0177815	1.83664	interior	15
3506	0.792746	0.251408			1.63483	0.266276	0.0486596	0.00608245	1.04415	1.95585	0.240777	0.140064	0.0556976	1.85802	interior	16
3507	0.793951	0.224008			1.62193	0.286389	0.0574197	0.0163043	1.01796	1.98204	0.220056	0.150074	0.022619	2.18736	interior	17
3508	0.779046	0.252518			1.57757	0.319006	0.0564137	0.0154466	1.03156	1.96844	0.244792	0.168201	0.0405172	2.16738	interior	18
3509	0.835392	0.183921			1.6371	0.259376	0.0687177	0.0154952	1.01931	1.98069	0.180436	0.136767	0.0231183	2.59328	interior	19
3510	0.825558	0.189993			1.64706	0.265044	0.056119	0.0162272	1.01555	1.98445	0.187084	0.138614	0.018837	2.12151	interior	20
3425	0.847313	0.224646			1.72363	0.130875	0.0735327		1.07196	1.92804	0.209566	0.0705711	0.0849257	2.75228	CRUST	21
3426	0.85724	0.219595			1.7138	0.135031	0.0743351		1.07684	1.92316	0.203927	0.0730358	0.0896314	2.78182	CRUST	22
3431	0.864731	0.224504			1.71388	0.159348	0.0375354		1.08924	1.91076	0.206112	0.0850662	0.103194	1.41101	CRUST	23
3432	0.729465	0.568953			1.33082	0.339111	0.0211002	0.0105501	1.29842	1.70158	0.438189	0.203069	0.409091	0.859087	CRUST	24
3432 bis	0.729545	0.568939			1.33106	0.339394	0.0204545	0.0106061	1.29848	1.70152	0.438156	0.203175	0.409138	0.832839	CRUST	25
3434	0.833064	0.246936	0.0180347		1.69734	0.159538	0.0346821	0.0104046	1.09803	1.90197	0.228645	0.0859171	0.11768	1.30859	CRUST	26
3436	0.870834	0.189612			1.76235	0.135831	0.0365433	0.00482648	1.06045	1.93955	0.178804	0.0715583	0.0694115	1.36218	CRUST	27
3438	0.848026	0.362326			1.6216	0.131884	0.0319074	0.00425431	1.21035	1.78965	0.299356	0.0752123	0.248049	1.22356	CRUST	28
3448	0.84003	0.281735			1.75401	0.102046	0.0221839		1.12176	1.87824	0.251154	0.0549801	0.144953	0.836152	CRUST	29
3448 bis	0.839497	0.281805			1.75518	0.101331	0.0221893		1.1213	1.8787	0.251319	0.0545817	0.144493	0.836288	CRUST	30
3449	0.857143	0.194929			1.7659	0.116142	0.0475436	0.0183382	1.05207	1.94793	0.185281	0.0617106	0.0607501	1.76902	CRUST	31
3450	0.84907	0.199862			1.76499	0.115782	0.0509993	0.019297	1.04893	1.95107	0.190539	0.061561	0.0576299	1.89867	CRUST	32
3451	0.816713	0.40309			1.51685	0.224017	0.0238764	0.0154494	1.2198	1.7802	0.330455	0.128681	0.269132	0.932022	CRUST	33
3452	0.814006	0.276965			1.61518	0.251295	0.0263454	0.0162126	1.09097	1.90903	0.25387	0.134636	0.111757	1.00947	CRUST	34
3453	0.871267	0.20637			1.65428	0.220969	0.0285335	0.01858	1.07764	1.92236	0.191502	0.117834	0.0891089	1.07756	CRUST	35
3454	0.771081	0.777513			1.24917	0.166508	0.022868	0.0128633	1.54859	1.45141	0.502077	0.117617	0.711461	0.946959	CRUST	36
3472-73-74	0.878876	0.198769			1.77068	0.102501	0.0491728		1.07765	1.92235	0.184447	0.0547202	0.088346	1.82845	CRUST	37
3475	0.817015	0.475523			1.53707	0.114068	0.0406369	0.0156844	1.29254	1.70746	0.367899	0.0690846	0.358057	1.5845	CRUST	38
3476-77	0.861217	0.217043			1.75583	0.125565	0.0403478		1.07826	1.92174	0.20129	0.0667406	0.0908724	1.50866	CRUST	39
3478-79	0.842393	0.21094			1.74701	0.123077	0.0584615	0.0181197	1.05333	1.94667	0.20026	0.0658135	0.0633117	2.18177	CRUST	40
3480-81	0.860384	0.212641			1.72686	0.130023	0.0646727	0.00541761	1.07302	1.92698	0.19817	0.0700219	0.0848747	2.41664	CRUST	41
3485	0.86279	0.179918			1.81281	0.0824625	0.0395275	0.0224898	1.04271	1.95729	0.172549	0.0435095	0.0494997	1.46178	CRUST	42
3486	0.854936	0.201478			1.78442	0.0980524	0.0449966	0.0161182	1.05641	1.94359	0.190718	0.052087	0.0659859	1.67254	CRUST	43
3487	0.855876	0.213458			1.7779	0.0947943	0.0470561	0.0109116	1.06933	1.93067	0.199617	0.0506191	0.0810093	1.75183	CRUST	44
3490	0.804911	0.248295			1.69236	0.226467	0.0238745	0.00409277	1.05321	1.94679	0.235751	0.118023	0.0661017	0.907455	CRUST	45

## Sheet: BASSIKOUNOU H5
Name	Fe	Mg	Mn	Ni	Cr	Al	Ti	V	sum A	sum B	Mg#	Al#	Fe3+/Fetot	TiO2 wt%	Type	Num
10755	0.865072	0.192629			1.57195	0.28902	0.0562296	0.0251022	1.0577	1.9423	0.18212	0.155306	0.0666998	2.13444	interior	1
10756	0.851802	0.211931			1.53762	0.311725	0.0621209	0.0248016	1.06373	1.93627	0.199233	0.168559	0.0748213	2.37135	interior	2
10757	0.866848	0.202452			1.55501	0.292289	0.0579885	0.0254115	1.0693	1.9307	0.189331	0.158225	0.0799446	2.20575	interior	3
10758	0.892201	0.203249			1.53148	0.320668	0.0523984		1.09545	1.90455	0.185539	0.173133	0.106983	2.0011	interior	4
10759	0.794866	0.300722			1.53402	0.28959	0.0569217	0.0238835	1.09559	1.90441	0.274484	0.1588	0.120256	2.19807	interior	5
10764	0.86621	0.234423			1.50547	0.116268	0.0450886		1.10063	1.66683	0.212989	0.0716936	0.38463	1.84158	interior	6
10765	0.910724	0.167112			1.60136	0.269425	0.0513781		1.07784	1.92216	0.155044	0.144017	0.085466	1.93905	interior	7
10766	0.837299	0.255826			1.4725	0.383649	0.0282737	0.0224561	1.09313	1.90687	0.234032	0.206691	0.111221	1.09731	interior	8
10767	0.944555	0.186314			1.42836	0.245591	0.195179		1.13087	1.86913	0.164753	0.146713	0.13855	7.35469	interior	9
10768	0.862669	0.200464			1.5522	0.322188	0.0384466	0.024031	1.06313	1.93687	0.18856	0.17189	0.0731839	1.46755	interior	10
10807	0.889882	0.184551		0.0452928	1.50186	0.302926	0.0499989	0.0254933	1.11973	1.88027	0.171766	0.167846	0.134541	1.90015	interior	11
10819	0.860988	0.196601			1.56544	0.294759	0.0591224	0.0230874	1.05759	1.94241	0.185896	0.158455	0.0668869	2.24698	interior	12
10820	0.886812	0.166873			1.58207	0.293849	0.0438088	0.0265903	1.05368	1.94632	0.158371	0.156643	0.0605367	1.65777	interior	13
10776	0.862634	0.180193			1.63709	0.273214	0.0234919	0.0233807	1.04283	1.95717	0.172793	0.143021	0.0496463	0.888686	CRUST	14
10792	0.315555	0.818068		0.0269086	1.50619	0.276158	0.0362505	0.0208677	1.16053	1.83947	0.72164	0.15494	0.508729	1.51917	CRUST	15
10793	0.330443	0.788513		0.0294389	1.5409	0.254332	0.0336901	0.0226833	1.14839	1.85161	0.704687	0.141671	0.449078	1.40067	CRUST	16
10794	0.318007	0.843736		0.0280541	1.47355	0.284073	0.032274	0.0203068	1.1898	1.8102	0.726268	0.161623	0.596834	1.36066	CRUST	17
10798	0.710076	0.367796			1.56198	0.304837	0.0280456	0.0272687	1.07787	1.92213	0.341224	0.163292	0.109666	1.09646	CRUST	18
10799	0.697512	0.47321			1.46597	0.308747	0.0299245	0.0246409	1.17072	1.82928	0.404204	0.17397	0.244758	1.19207	CRUST	19
10800	0.533127	0.820742			1.32677	0.27675	0.0214811	0.021127	1.35387	1.64613	0.60622	0.172589	0.663762	0.905135	CRUST	20
10801	0.878493	0.284415			1.47158	0.306514	0.0336199	0.025374	1.16291	1.83709	0.244572	0.172383	0.18544	1.30002	CRUST	21
10804	0.365485	0.787088		0.020665	1.5092	0.275766	0.0188126	0.0229849	1.17324	1.82676	0.682897	0.154494	0.473994	0.784903	CRUST	22
10805	0.52687	0.629452		0.0313396	1.50505	0.248165	0.0406064	0.0185203	1.18766	1.81234	0.544357	0.141549	0.356181	1.64503	CRUST	23
10810	0.410148	0.687516		0.0227237	1.53473	0.285639	0.0345653	0.0246769	1.12039	1.87961	0.626345	0.156913	0.293523	1.4186	CRUST	24
10814	0.417491	0.67362		0.0298645	1.59376	0.232851	0.026192	0.026217	1.12098	1.87902	0.617371	0.127477	0.289767	1.06541	CRUST	25
10815	0.31721	0.790737		0.0223214	1.52433	0.26955	0.0552594	0.0205965	1.13027	1.86973	0.713696	0.150261	0.410669	2.30112	CRUST	26
10816	0.266211	0.952382		0.032572	1.44282	0.249435	0.0374832	0.019093	1.25116	1.74884	0.781543	0.147397	0.943481	1.60381	CRUST	27

## Sheet: CHELYABINSK LL5
Name	Fe	Mg	Mn	Ni	Cr	Al	Ti	V	sum A	sum B	Mg#	Al#	Fe3+/Fetot	TiO2 wt%	Type	Num
2671-B2811-12-13	0.992787	0.107794			1.54819	0.275496	0.0757363		1.10058	1.89942	0.0979428	0.151066	0.101312	2.83532	interior	1
2720-21	0.942385	0.131575			1.48131	0.392296	0.0524357		1.07396	1.92604	0.122514	0.209381	0.0784819	1.9972	interior	2
2728	0.935243	0.103996	0.0180549		1.58666	0.317766	0.0382764		1.05729	1.94271	0.100069	0.166856	0.0612613	1.43915	interior	3
2729	0.993019	0.106885			1.54694	0.265768	0.0873857		1.0999	1.9001	0.0971766	0.146614	0.100606	3.26653	interior	4
2730	0.943555	0.155855			1.45577	0.361415	0.0834035		1.09941	1.90059	0.141762	0.198887	0.105357	3.17639	interior	5
2731	0.948867	0.129678			1.4407	0.40485	0.0759093		1.07855	1.92145	0.120235	0.219366	0.0827778	2.89378	interior	6
3825	0.901792	0.201434			1.50251	0.270968	0.103226	0.0200717	1.10323	1.89677	0.182586	0.152789	0.114467	3.91516	interior	7
3826	0.908531	0.161374			1.53981	0.282938	0.0874408	0.0199052	1.06991	1.93009	0.150831	0.155226	0.0769431	3.30016	interior	8
3827	0.928469	0.152361			1.53648	0.259657	0.102289	0.0207439	1.08083	1.91917	0.140966	0.144564	0.087057	3.8446	interior	9
3828	0.896231	0.142462			1.56407	0.333166	0.0407035	0.0233668	1.03869	1.96131	0.137155	0.175606	0.0431735	1.54143	interior	10
3829	0.904669	0.208658			1.50657	0.25535	0.105788	0.0189689	1.11333	1.88667	0.187418	0.144928	0.125269	4.00983	interior	11
2722	0.609783	0.477717			1.5644	0.254348	0.0782609	0.0154891	1.0875	1.9125	0.43928	0.139848	0.143494	3.09044	CRUST	12
2723	0.697256	0.496569			1.53602	0.254717	0.0154374		1.19383	1.80617	0.244304	0.142241	0.126186	0.613468	CRUST	13
2724	0.623171	0.566121			1.49737	0.245758	0.0675834		1.18929	1.81071	0.476015	0.140987	0.303756	2.70925	CRUST	14
2724 BIS	0.372438	0.42768			1.85863	0.108702	0.161271	0.0712801	0.800119	2.19988	0.534521	0.0552536	0	6.16492	CRUST	15
B2823-24-25-31	0.508083	0.729717			1.4404	0.247243	0.0645868		1.2378	1.75223	0.589528	0.146502	0.48766	2.67181	CRUST	16
B2826	0.508461	0.801773		0.0153102	1.42305	0.208703	0.0427075		1.32554	1.67446	0.611931	0.127901	0.640254	1.77551	CRUST	17
3833	0.722052	0.391271			1.50842	0.309342	0.0689127		1.11332	1.88668	0.351444	0.170177	0.156946	2.70493	CRUST	18
3834-35	0.348925	0.918584			1.42035	0.249937	0.0458913	0.0163085	1.26751	1.73249	0.724716	0.149637	0.766667	1.95386	CRUST	19
3836-37	0.503831	0.68957			1.43512	0.253213	0.0982452	0.0200198	1.1934	1.8066	0.577819	0.149978	0.383861	4.01904	CRUST	20
3838-39	0.618696	0.49371			1.52856	0.265897	0.0810156	0.0121177	1.11241	1.88759	0.443822	0.148177	0.181683	3.21323	CRUST	21
3840	0.60734	0.532502			1.46078	0.254018	0.125929	0.0194291	1.13984	1.86016	0.467172	0.148133	0.230253	5.01633	CRUST	22
3841	0.658572	0.470935			1.51729	0.281825	0.0971302	0.0198675	1.12951	1.91611	0.416938	0.156646	0.127374	3.78158	CRUST	23
3842	0.674025	0.48418			1.44739	0.291391	0.0824135	0.0206034	1.1582	1.8418	0.418043	0.167584	0.234716	3.27731	CRUST	24
3844	0.474148	0.733644			1.42833	0.263171	0.0845381	0.0161725	1.20779	1.79221	0.607425	0.155585	0.438243	3.48954	CRUST	25

## Sheet: CHERGACH H5
Name	Fe	Mg	Mn	Ni	Cr	Al	Ti	V	sum A	sum B	Mg#	Al#	Fe3+/Fetot	TiO2 wt%	Type	Num
3154	0.859098	0.149012	0.0235682		1.5707	0.352762	0.0448555		1.03168	1.96832	0.147813	0.183399	0.0368732	1.70391	interior	1
3155	0.870498	0.16092			1.57011	0.348659	0.0498084		1.03142	1.96858	0.156018	0.181709	0.0360915	1.89413	interior	2
3177	0.806962	0.204479	0.0219085		1.59494	0.318403	0.0533106		1.03335	1.96665	0.202166	0.166412	0.0413273	2.03342	interior	3
3178	0.808405	0.202279	0.019943		1.59615	0.317664	0.0555556		1.03063	1.96937	0.200141	0.165984	0.0378855	2.11794	interior	4
3179	0.824119	0.204746	0.0234834		1.57779	0.316292	0.0535714		1.05235	1.94765	0.199001	0.16699	0.0635203	2.04371	interior	5
3180	0.864714	0.181311	0.0195258		1.57671	0.304045	0.053696		1.06555	1.93445	0.173333	0.161661	0.0758065	2.03878	interior	6
3181	0.828068	0.168993	0.0235121		1.58633	0.349008	0.0440852		1.02057	1.97943	0.169492	0.180334	0.0248447	1.67858	interior	7
3182	0.851636	0.170327	0.0287383		1.55537	0.345561	0.0483645		1.0507	1.9493	0.166667	0.181785	0.0595336	1.84212	interior	8
3183	0.88519	0.167799	0.0339674		1.53397	0.331522	0.0475543		1.08696	1.91304	0.159355	0.177713	0.0982348	1.80891	interior	9
3205	0.835283	0.161441	0.0287787		1.61582	0.311652	0.0470285		1.0255	1.9745	0.161972	0.16169	0.0305322	1.78082	interior	10
3206	0.825922	0.170293	0.025544		1.60856	0.31859	0.051088		1.02176	1.97824	0.17094	0.165317	0.0263459	1.93838	interior	11
3207	0.839433	0.162928	0.0276269		1.60874	0.318772	0.042503		1.02999	1.97001	0.162544	0.16538	0.0357243	1.61143	interior	12
3216	0.855441	0.205278	0.0259225		1.54764	0.313171	0.0525455		1.08664	1.91336	0.193527	0.168298	0.101283	2.00541	interior	13
3218	0.258466	0.614375			1.10988	1.01728	0		0.87284	2.12716	0.70388	0.478233	0	0	interior	14
3158	0.398253	1.0341		0.0152198	1.21421	0.308625	0.0295941		1.44758	1.55242	0.72196	0.202665	1.12385	1.30062	CRUST	15
3159	0.395485	1.02341	0.0133779	0.0158863	1.21739	0.302676	0.0317726		1.44816	1.55184	0.721273	0.19912	1.13319	1.39267	CRUST	16
3186	0.527296	0.614541			1.50077	0.319133	0.0382653		1.14184	1.85816	0.538204	0.175357	0.268989	1.55963	CRUST	17
3187	0.471208	0.591032	0.0198481		1.50478	0.369027	0.0441068		1.08209	1.91791	0.556401	0.19694	0.174207	1.80005	CRUST	18
3188	0.493171	0.593323	0.0227618		1.51138	0.336115	0.0432473		1.10926	1.89074	0.546089	0.18193	0.221538	1.75929	CRUST	19
3199	0.462629	0.805718			1.38856	0.322152	0.0209365		1.26835	1.73165	0.63525	0.188314	0.580049	0.883526	CRUST	20
3200	0.44582	0.965944	0.0185759		1.1973	0.339431	0.0329299		1.43034	1.56966	0.684211	0.220879	0.965278	1.43613	CRUST	21
3201	0.301812	1.02679			1.36249	0.308905			1.32861	1.67139	0.772835	0.184818	1.08877	0	CRUST	22
3202	0.326017	0.946734			1.36108	0.33485	0.0313169		1.27275	1.72725	0.743849	0.197443	0.836617	1.35554	CRUST	23
3203	0.448769	1.00152			1.17483	0.347522	0.0273639		1.45029	1.54971	0.690566	0.22828	1.00339	1.20266	CRUST	24
3204	0.292506	1.00322	0.0193392		1.33199	0.315874	0.0370669		1.31507	1.68493	0.774254	0.191687	1.07713	1.61737	CRUST	25
3226	0.849203	0.179409	0.0246248		1.57669	0.327861	0.0422139		1.05324	1.94676	0.174419	0.172146	0.0626899	1.60689	CRUST	26
3227	0.805433	0.119958	0.0251807		1.79308	0.210888	0.0454651		0.950571	2.04943	0.12963	0.105236	0	1.68851	CRUST	27
3228	0.881372	0.202948	0.0239188		1.54095	0.319642	0.0311669		1.10824	1.89176	0.187166	0.171796	0.122807	1.19097	CRUST	28
3229	0.866462	0.261704			1.44359	0.402149	0.0260936		1.12817	1.87183	0.231973	0.217879	0.147919	1.01654	CRUST	29
3230	0.691137	0.309346	0.0181116		1.33953	0.594784	0.0470901		1.01859	1.98141	0.309196	0.307491	0.0269043	1.88791	CRUST	30
3231	0.840176	0.217742			1.56158	0.332845	0.047654		1.05792	1.94208	0.205821	0.175697	0.0689354	1.82536	CRUST	31

## Sheet: KABO H4
Name	Fe	Mg	Mn	Ni	Cr	Al	Ti	V	sum A	sum B	Mg#	Al#	Fe3+/Fetot	TiO2 wt%	Type	Num
8653-54-55	0.974757	0.122855			1.59245	0.224862	0.0850791		1.09761	1.90239	0.111929	0.123734	0.100139	3.17259	interior	1
8656	0.985323	0.116916			1.59547	0.224406	0.0778836		1.10224	1.89776	0.106071	0.123308	0.103762	2.90222	interior	2
8689	1.00703	0.13174			1.53143	0.245806	0.0839974		1.13877	1.86123	0.115687	0.138308	0.137798	3.14663	interior	3
8690	1.00995	0.0988403			1.56813	0.241084	0.0819917		1.10879	1.89121	0.0891423	0.133253	0.107721	3.05328	interior	4
8691	1.01353	0.124265			1.54281	0.239472	0.079926		1.1378	1.8622	0.109215	0.134363	0.135956	2.98876	interior	5
8696	1.01888	0.134264			1.51837	0.236782	0.0916968		1.15315	1.84685	0.116432	0.134906	0.15031	3.43319	interior	6
8697	1.01449	0.139535			1.53047	0.238125	0.0773767		1.15402	1.84598	0.120912	0.13464	0.151824	2.90056	interior	7
8712	0.966551	0.150393			1.58746	0.217742	0.0778555		1.11694	1.88306	0.134647	0.120619	0.120991	2.91409	interior	8
8713	0.968133	0.144474			1.58728	0.232762	0.0673513		1.11261	3.40732	0.129851	0.127888	0	2.52343	interior	9
8717	1.00021	0.121324			1.57303	0.233187	0.072252		1.12153	1.87847	0.108177	0.129102	0.121507	2.69816	interior	10
8657	0.941752	0.191827			1.56132	0.224022	0.0810787		1.13358	1.86642	0.169222	0.125478	0.141841	3.0565	CRUST	11
8659	0.931383	0.183343			1.58395	0.210384	0.090938		1.11473	1.88527	0.164474	0.117249	0.123178	3.41648	CRUST	12
8660	0.989134	0.119756			1.58984	0.231496	0.0697775		1.10889	1.89111	0.107996	0.127102	0.110086	2.60412	CRUST	13
8661	0.949931	0.175392			1.57585	0.208934	0.0898908		1.12532	1.87468	0.155859	0.117064	0.131929	3.37335	CRUST	14
8662	1.01481	0.105815			1.58109	0.232969	0.0653141		1.12063	1.87937	0.0944251	0.128424	0.118867	2.43372	CRUST	15
8663	1.0124	0.109628			1.56699	0.240772	0.0702096		1.12203	1.87797	0.0977052	0.133188	0.120537	2.61982	CRUST	16
8665-67	1.01019	0.108811			1.57857	0.233712	0.0687158		1.119	1.881	0.0972398	0.12896	0.117798	2.56158	CRUST	17
8669	0.594479	0.280598			1.79968	0.225865	0.0993778		0.875077	2.12492	0.320655	0.111508	0	3.77667	CRUST	18
8673	0.548038	0.690745		0.0521465	1.5239	0.155703	0.019035		1.29093	1.69864	0.5576	0.0927021	0.549885	0.774463	CRUST	19
8675	0.668896	0.763202		0.0517506	1.33475	0.181397			1.48385	1.51615	0.532926	0.119643	0.723354	0	CRUST	20
8676-7-8-9-80-81-82	0.582214	0.511754		0.00947414	1.62272	0.200473	0.0733649		1.10344	1.89656	0.467796	0.109957	0.177671	2.89378	CRUST	21

## Sheet: KILABO LL6
Name	Fe	Mg	Mn	Ni	Cr	Al	Ti	V	sum A	sum B	Mg#	Al#	Fe3+/Fetot	TiO2 wt%	Type	Num
8655-56	1.04272	0.100677			1.53001	0.220057	0.106538		1.14339	1.85661	0.0880515	0.125742	0.137519	3.95961	interior	1
8652-57-58-59	1.02647	0.10919			1.53551	0.219995	0.108833		1.13566	1.86434	0.0961465	0.125317	0.132159	4.04916	interior	2
8660	1.07872	0.0929504			1.50275	0.235301	0.0902786		1.17167	1.82833	0.0793316	0.135382	0.159141	3.36028	interior	3
8680	1.01733	0.123294			1.53191	0.216561	0.110898		1.14063	1.85937	0.108093	0.123857	0.138231	4.13313	interior	4
8681	1.00845	0.12763			1.5308	0.224143	0.108971		1.13608	1.86392	0.112342	0.127721	0.134942	4.06729	interior	5
8682	1.03326	0.109579			1.54016	0.208225	0.10878		1.14284	1.85716	0.0958834	0.119096	0.138241	4.04244	interior	6
8683	0.994493	0.125065			1.53763	0.250073	0.0927389		1.11956	1.88044	0.111709	0.139885	0.12022	3.47056	interior	7
8686	1.01515	0.115522			1.53059	0.240729	0.0980111		1.13067	1.86933	0.102172	0.135904	0.12872	3.65913	interior	8
8687	1.0179	0.112733			1.53571	0.219435	0.114223		1.13063	1.86937	0.0997076	0.125024	0.128337	4.25079	interior	9
8693	1.0616	0.0972154			1.51618	0.253426	0.0715795		1.15882	1.84118	0.0838918	0.143211	0.149603	2.67184	interior	10
8700	1.0681	0.107664			1.49301	0.241979	0.0892473		1.17576	1.82424	0.0915692	0.13947	0.164557	3.33202	interior	11
8701	1.09276	0.0890374			1.49111	0.220367	0.106729		1.1818	1.8182	0.0753408	0.128758	0.166364	3.96301	interior	12
8702	1.08904	0.087172			1.5068	0.210571	0.106417		1.17621	1.82379	0.0741126	0.122612	0.161804	3.94544	interior	13
8812-13-14-16-17	1.04515	0.174932		0.00738665	1.3843	0.304602	0.083621		1.22747	1.77253	0.143377	0.180354	0.217645	3.17997	CRUST	14
8818	1.44395	0.0963678		0.059409	1.14671	0.177904	0.0756598		1.59973	1.40027	0.0625636	0.134306	0.415337	2.82057	CRUST	15
8819-20	0.949984	0.263286			1.34081	0.357854	0.0880687		1.21327	1.78673	0.217005	0.210668	0.224498	3.41516	CRUST	16
8823	0.978962	0.297027			1.36932	0.262614	0.0920745		1.27599	1.72401	0.232782	0.160921	0.28192	3.55199	CRUST	17
8824-25-26-27-28-29-30-31	0.987666	0.342284			1.33722	0.23994	0.0928928		1.32995	1.67005	0.257366	0.152134	0.33407	3.60236	CRUST	18
8832-33-35-36	0.638882	0.603413			1.39039	0.313006	0.054312		1.2423	1.7577	0.485724	0.183754	0.379249	2.21197	CRUST	19
8838-40	1.09246	0.146525		0.0298628	1.41553	0.230053	0.0855745		1.26884	1.73116	0.118263	0.139801	0.246092	3.21356	CRUST	20
8846-47	0.982538	0.214235			1.4288	0.313043	0.0613821		1.19677	1.80323	0.179011	0.179719	0.20027	2.35027	CRUST	21
8850-51-52	1.05498	0.0979668			1.50445	0.244354	0.0982572		1.15294	1.84706	0.0849711	0.139727	0.144973	3.66196	CRUST	22

## Sheet: NWA 869 L3-6
Name	Fe	Mg	Mn	Ni	Cr	Al	Ti	V	sum A	sum B	Mg#	Al#	Fe3+/Fetot	TiO2 wt%	Type	Num
10862	1.0069	0.140291		0.0217248	1.46062	0.263125	0.0851101	0.0222346	1.16891	1.83109	0.122291	0.152648	0.167757	3.2001	interior	1
10863	0.940944	0.142614			1.65396	0.178018	0.0592476	0.0252126	1.08356	1.91644	0.131617	0.0971722	0.0888024	2.2044	interior	2
10866	0.969595	0.14057			1.55415	0.249647	0.0620746	0.0239622	1.11016	1.88984	0.126621	0.138401	0.113619	2.32939	interior	3
10867	0.960861	0.165407			1.5185	0.27285	0.0590034	0.0233747	1.12627	1.87373	0.146863	0.152315	0.131412	2.22924	interior	4
10869	0.98738	0.0949601			1.61149	0.19842	0.0766442	0.0311099	1.08234	1.91766	0.0877359	0.10963	0.0833924	2.83767	interior	5
10870	1.03557	0.158964		0.0274731	1.45808	0.216218	0.0804403	0.0232582	1.222	1.778	0.133077	0.129139	0.214379	3.01938	interior	6
10871	0.937336	0.168856			1.54043	0.243567	0.0899958	0.0198149	1.10619	1.89381	0.152647	0.136529	0.113292	3.38686	interior	7
10872	0.92567	0.174424			1.54431	0.240866	0.0945987	0.0201324	1.10009	1.89991	0.158554	0.134926	0.108131	3.56117	interior	8
10876	0.926505	0.174022			1.54434	0.243554	0.0869224	0.0246527	1.10053	1.89947	0.158126	0.136224	0.108501	3.2736	interior	9
10877	0.95051	0.1594			1.54087	0.233798	0.0918734	0.0235475	1.10991	1.89009	0.143616	0.131742	0.115633	3.4489	interior	10
10825	0.945147	0.173149			1.53358	0.246553	0.0794691	0.0220989	1.1183	1.8817	0.154833	0.138503	0.125161	2.99498	CRUST	11
10826	0.892482	0.210691			1.73609	0.0817178	0.049118	0.0298975	1.10317	1.89683	0.190986	0.0449539	0.115603	1.82636	CRUST	12
10830	0.920996	0.192251			1.55184	0.240922	0.0693813	0.0246072	1.11325	1.88675	0.172694	0.134386	0.122961	2.62077	CRUST	13
10831	1.00119	0.184561			1.50721	0.231712	0.0753289		1.18575	1.81425	0.155648	0.133251	0.185532	2.84246	CRUST	14
10832	1.00893	0.105296		0.00883174	1.53821	0.246324	0.0691025	0.0233025	1.12306	1.87694	0.0945013	0.138032	0.12197	2.57863	CRUST	15
10837	0.942867	0.160902			1.61711	0.1826	0.0710885	0.0254362	1.10377	1.89623	0.145775	0.101461	0.110057	2.65398	CRUST	16
10838	0.944217	0.164852			1.61453	0.181366	0.0679815	0.0270536	1.10907	1.89093	0.14864	0.100989	0.115512	2.53952	CRUST	17
10839	0.944316	0.186347			1.53513	0.236005	0.0772586	0.0209477	1.13066	1.86934	0.164812	0.133251	0.138367	2.91458	CRUST	18
10844	0.896281	0.207393			1.4835	0.305916	0.0890722	0.0178409	1.10367	1.89633	0.187912	0.170959	0.115672	3.39635	CRUST	19
10845	0.928297	0.197449			1.47984	0.29432	0.0832988	0.0167946	1.12575	1.87425	0.175394	0.165893	0.135459	3.16879	CRUST	20
10846	0.925789	0.190996			1.51149	0.271559	0.0822296	0.0179344	1.11679	1.88321	0.171023	0.1523	0.126147	3.11618	CRUST	21
10847	0.943054	0.19322			1.47775	0.285671	0.0805182	0.0197821	1.13627	1.86373	0.170047	0.161998	0.144503	3.05876	CRUST	22
10848	0.927516	0.195781			1.48385	0.291395	0.0812548	0.0202028	1.1233	1.8767	0.174291	0.164144	0.132933	3.0892	CRUST	23
10849	0.922939	0.190647			1.5	0.288156	0.0788628	0.0193992	1.11359	1.88641	0.171201	0.161147	0.12307	2.99435	CRUST	24
10850	0.905368	0.202429			1.49743	0.289013	0.0872374	0.0185223	1.1078	1.8922	0.182731	0.161781	0.119063	3.31761	CRUST	25
10854	0.946101	0.158053			1.66567	0.156447	0.0467966	0.0269346	1.10415	1.89585	0.143144	0.0858603	0.110088	1.74182	CRUST	26
10855	0.957345	0.15039			1.65613	0.166812	0.040663	0.0286593	1.10774	1.89226	0.135764	0.0915071	0.112535	1.51393	CRUST	27
10859	0.817611	0.278593			1.4087	0.460451	0.0346474		1.0962	1.9038	0.254144	0.246343	0.117665	1.3619	CRUST	28
10860	0.891543	0.176324			1.53786	0.338215	0.0374029	0.0186533	1.06787	1.93213	0.165118	0.180278	0.0761236	1.42538	CRUST	29
10864	0.939851	0.139033			1.57875	0.258746	0.0575671	0.0260573	1.07888	1.92112	0.128867	0.140815	0.0839322	2.16094	CRUST	30

## Sheet: TAMDAKHT H5
Name	Fe	Mg	Mn	Ni	Cr	Al	Ti	V	sum A	sum B	Mg#	Al#	Fe3+/Fetot	TiO2 wt%	Type	Num
3595	0.778866	0.224778			1.56866	0.366204	0.0498747	0.0116147	1.00364	1.99636	0.223962	0.189266	0.00467836		interior	1
3596	0.764505	0.21843	0.0204778		1.57474	0.361775	0.047099	0.0129693	1.00341	1.99659	0.222222	0.186817	0.00446429	1.80891	interior	2
3597	0.767725	0.210668	0.0249831		1.57731	0.352465	0.0540176	0.0128292	1.00338	1.99662	0.215321	0.182645	0.00439754	2.06964	interior	3
3598	0.769773	0.204545	0.0190909		1.59136	0.351818	0.0497727	0.0136364	0.993409	2.00659	0.209937	0.181053	0	1.90482	interior	4
3599	0.772821	0.210707	0.0219629		1.58545	0.348662	0.0494166	0.0109815	1.00549	1.99451	0.214236	0.18027	0.0071048	1.89271	interior	5
3604	0.766373	0.225732	0.0229912		1.55992	0.364375	0.0480725	0.0125406	1.0151	1.9849	0.227528	0.189356	0.019697	1.84933	interior	6
3606	0.80597	0.166893	0.0291723		1.62551	0.3019	0.0563094	0.0142469	1.00204	1.99796	0.171548	0.156635	0.00252525	2.13033	interior	7
3607	0.805877	0.169366	0.0270708		1.64091	0.301944	0.0548357		1.00231	1.99769	0.173665	0.155413	0.00287109	2.07526	interior	8
3614	0.7803	0.197458	0.0285974		1.62256	0.311847	0.0510667	0.00817068	1.00635	1.99365	0.20195	0.161211	0.00814427	1.94344	interior	9
3615	0.790118	0.19107	0.0265186		1.61627	0.309383	0.0523572	0.0142792	1.00771	1.99229	0.194733	0.160664	0.0097533	1.9901	interior	10
3623	0.818306	0.165031	0.0267062		1.61402	0.312942	0.0479343	0.0150651	1.01004	1.98996	0.167827	0.162402	0.0122734	1.8159	interior	11
3624	0.731774	0.243925	0.0258914		1.49625	0.446287	0.0456507	0.0102203	1.00159	1.99841	0.25	0.229744	0.00217256	1.77823	interior	12
3625	0.735488	0.241065	0.0198042		1.514	0.433644	0.0443888	0.0116094	0.996358	2.00364	0.246853	0.222651	0	1.72548	interior	13
3629	0.833942	0.15555	0.0274098		1.59045	0.348104	0.0356327	0.00890818	1.0169	1.9831	0.157202	0.179569	0.0202684	1.35406	CRUST	14
3605 bis	0.830831	0.147883	0.0275599		1.61259	0.342819	0.0221824	0.0161326	1.00627	1.99373	0.151099	0.175318	0.00755124	0.841509	CRUST	15
3612 bis	0.586068	0.444072	0.0274615	0.00535834	1.56731	0.32284	0.03215	0.0147354	1.06296	1.93704	0.431079	0.170801	0.107429	1.27423	CRUST	16
3613 bis	0.548797	0.466409	0.0231502		1.59464	0.32887	0.024512	0.0136178	1.03836	1.96164	0.459423	0.170973	0.0698925	0.975341	CRUST	17
3618 bis	0.800316	0.249379	0.0223628		1.54574	0.332731	0.033883	0.0155862	1.07206	1.92794	0.237573	0.177128	0.0900367	1.30503	CRUST	18
3630	0.64105	0.434396		0.0168697	1.58575	0.288191	0.0175726	0.0161668	1.09231	1.90769	0.403922	0.153788	0.144006	0.692862	CRUST	19
3633	0.697044	0.499878	0.0212558	0.0087955	1.47691	0.266064	0.0300513		1.22697	1.77303	0.417636	0.152649	0.325622	1.19697	CRUST	20
3634	0.697559	0.47926	0.0156435		1.49538	0.270206	0.030576	0.0113771	1.19246	1.80754	0.407251	0.153041	0.275909	1.21387	CRUST	21
3636	0.85982	0.15059			1.60791	0.33102	0.0346981	0.0159611	1.01041	1.98959	0.149038	0.170723	0.0121065	1.31464	CRUST	22
3637	0.838277	0.175141			1.60593	0.319915	0.0466102	0.0141243	1.01342	1.98658	0.172822	0.166117	0.0160067	1.76983	CRUST	23
3638	0.850214	0.160485			1.60485	0.343795	0.0263909	0.0142653	1.0107	1.9893	0.158786	0.176428	0.0125839	1.00305	CRUST	24
3639	0.756456	0.337215			1.55924	0.311392	0.0197468	0.0159494	1.09367	1.90633	0.308333	0.166464	0.123829	0.769324	CRUST	25
3641	0.870667	0.138417	0.0272532		1.60722	0.322735	0.0243844	0.00932345	1.03634	1.96366	0.137171	0.167224	0.0417353	0.922015	CRUST	26

## Sheet: VIÑALES L6
Name	Fe	Mg	Mn	Ni	Cr	Al	Ti	V	sum A	sum B	Mg#	Al#	Fe3+/Fetot	TiO2 wt%	Type	Num
11103	0.876774	0.186294			1.60594	0.236381	0.0711072	0.0235	1.06307	1.93693	0.175242	0.128306	0.0719317	2.67941	interior	1
11104	0.918116	0.166828			1.56205	0.254214	0.0763002	0.0224881	1.08494	1.91506	0.153766	0.139965	0.0925204	2.87375	interior	2
11105	0.926998	0.141327			1.59499	0.243722	0.0690817	0.023879	1.06833	1.93167	0.132289	0.13255	0.0737062	2.58838	interior	3
11106	0.932628	0.121439			1.63117	0.232105	0.0580806	0.0245822	1.05407	1.94593	0.11521	0.124569	0.0579719	2.1667	interior	4
11107	0.878901	0.176051			1.62914	0.249958	0.0415109	0.0244368	1.05495	1.94505	0.166881	0.13302	0.0625233	1.56492	interior	5
11108	0.899885	0.204883			1.57992	0.213434	0.0806986	0.0211789	1.10477	1.89523	0.185453	0.119014	0.116424	3.04291	interior	6
11110	0.91407	0.176992			1.58082	0.234571	0.0696355	0.0239107	1.09106	1.90894	0.16222	0.129212	0.0996223	2.62128	interior	7
11134	0.949669	0.130603			1.59084	0.221943	0.0844201	0.0225232	1.08027	1.91973	0.120898	0.122432	0.0845262	3.14987	interior	8
11135	0.93729	0.136389			1.61568	0.215765	0.0710497	0.0238308	1.07368	1.92632	0.127029	0.117812	0.0786083	2.65166	interior	9
11136	0.938397	0.139607			1.6266	0.195824	0.0749298	0.0246389	1.078	1.922	0.129505	0.107452	0.0831249	2.79134	interior	10
11137	0.829665	0.239268			1.37209	0.504673	0.0543074		1.06893	1.93107	0.223838	0.268907	0.083086	2.13128	interior	11
11138	0.918242	0.215084			1.35014	0.40831	0.0973411	0.0108853	1.13333	1.86667	0.189781	0.232199	0.145198	3.7635	interior	12
11146	0.953008	0.134362			1.62383	0.202467	0.0863361		1.08737	1.91263	0.123566	0.110862	0.0916777	3.21579	interior	13
11147	0.965432	0.12065			1.59627	0.210577	0.0838207	0.0232463	1.08608	1.91392	0.111087	0.116544	0.0891642	3.11918	interior	14
11148	0.948103	0.143789			1.60591	0.228648	0.0735503		1.09189	1.90811	0.131688	0.124634	0.0969216	2.75266	interior	15
11100	0.945014	0.137402			1.60234	0.231564	0.0577404	0.025937	1.08242	1.91758	0.12694	0.126268	0.0872112	2.16017	CRUST	16
11101	0.900503	0.151108			1.60753	0.241102	0.0738238	0.0259299	1.05161	1.94839	0.143692	0.130422	0.0573132	2.7681	CRUST	17
11114	0.633575	0.467569			1.58699	0.201156	0.0878056	0.0229028	1.10114	1.89886	0.424621	0.112494	0.159641	3.43975	CRUST	18
11115	0.914008	0.236434			1.58975	0.179976	0.0579857	0.0218485	1.15044	1.84956	0.205516	0.101697	0.164596	2.19099	CRUST	19
11116	0.900324	0.233586			1.55325	0.232737	0.060078	0.0200298	1.13391	1.86609	0.206001	0.130313	0.148735	2.28248	CRUST	20
11120	0.92118	0.200824			1.60858	0.17948	0.0662109	0.023726	1.122	1.878	0.178987	0.100377	0.132443	2.48669	CRUST	21
11121	0.902717	0.196777			1.60843	0.194887	0.0747743	0.0224132	1.09949	1.90051	0.178971	0.108071	0.110216	2.81001	CRUST	22
11122	0.867469	0.188199			1.61928	0.236545	0.0640688	0.0244351	1.05567	1.94433	0.178275	0.127461	0.0641721	2.4149	CRUST	23
11123	0.899914	0.186003			1.59571	0.238362	0.0563697	0.0236369	1.08592	1.91408	0.171287	0.129963	0.0954728	2.12601	CRUST	24
11124	0.927484	0.182717			1.57715	0.205083	0.0860297	0.021534	1.1102	1.8898	0.16458	0.115071	0.118817	3.23012	CRUST	25
11125	0.920258	0.185508			1.57962	0.209797	0.084116	0.0207022	1.10577	1.89423	0.167765	0.117243	0.114931	3.16115	CRUST	26
11126	0.945649	0.16488			1.58346	0.203248	0.0839637	0.0188011	1.11053	1.88947	0.14847	0.113756	0.116881	3.14366	CRUST	27
11127	0.852339	0.247787			1.59677	0.209873	0.0728226	0.0204103	1.10013	1.89987	0.225235	0.116168	0.117471	2.76255	CRUST	28
11128	0.93292	0.170976			1.59807	0.191258	0.0855766	0.0211948	1.1039	1.8961	0.154884	0.106888	0.111366	3.20196	CRUST	29
11129	0.912956	0.176779	0.0163678		1.58069	0.206757	0.0856387	0.0208151	1.1061	1.8939	0.162222	0.115672	0.116219	3.21322	CRUST	30
11130	0.94386	0.151942			1.61469	0.179021	0.0872301	0.0232613	1.0958	1.9042	0.138658	0.0998053	0.1015	3.24946	CRUST	31
11131	0.918574	0.196946			1.57113	0.20752	0.0856727	0.0201618	1.11552	1.88448	0.176551	0.116673	0.12576	3.22478	CRUST	32

## Sheet: EL HAMMAMI H5
Name	Fe	Mg	Mn	Ni	Cr	Al	Ti	V	sum A	sum B	Mg#	Al#	Fe3+/Fetot	TiO2 wt%	Type	Num
3830	0.786312	0.219772	0.0273764		1.5635	0.304183	0.0768061	0.0220532	1.03346	1.96654	0.218443	0.162866	0.0425532	2.9305	interior	1
3847	0.829153	0.153336	0.0298154		1.61287	0.314482	0.045433	0.045433	1.0123	2.01822	0.156069	0.163168	0	1.70022	interior	2
3848	0.809411	0.189406	0.0227004		1.59825	0.304327	0.0602979	0.0156065	1.02152	1.97848	0.189631	0.159955	0.0265849	2.29025	interior	3
3849	0.807554	0.161367	0.0315563		1.61511	0.35214	0.0222328	0.0100406	1.00048	1.99952	0.166543	0.179001	0.000592066	0.84596	interior	4
3850	0.816576	0.166	0.024017		1.61267	0.317165	0.0487403	0.014834	1.00659	1.99341	0.168943	0.164348	0.00807382	1.84745	interior	5
3851	0.748387	0.309677			1.57563	0.296774	0.0551971	0.0143369	1.05806	1.94194	0.292683	0.158499	0.0775862	2.1346	interior	6
3852	0.791468	0.261678			1.56864	0.303861	0.0607722	0.0135844	1.05315	1.94685	0.248473	0.162276	0.0671484	2.33461	interior	7
3854	0.8455	0.159461	0.0177179		1.5932	0.335223	0.0389794	0.00992204	1.02268	1.97732	0.158674	0.173833	0.0268231	1.47986	interior	8
3855	0.803725	0.203438			1.60315	0.308023	0.0601719	0.02149	1.00716	1.99284	0.201991	0.161169	0.00891266	2.29048	interior	9
3856	0.811235	0.194954	0.0207094		1.58605	0.324923	0.0471316	0.0149964	1.0269	1.9731	0.193754	0.17003	0.0331573	1.79666	interior	10
3857	0.814886	0.200822			1.59207	0.30522	0.0659739	0.0210246	1.01571	1.98429	0.197716	0.160871	0.0192764	2.50966	interior	11
3858	0.807103	0.218195			1.57407	0.32182	0.05838	0.020433	1.0253	1.9747	0.212811	0.169746	0.0313442	2.23175	interior	12
3859	0.819522	0.180478	0.0224719		1.60885	0.297753	0.0625	0.00842697	1.02247	1.97753	0.180478	0.156169	0.0274207	2.36872	interior	13
3860	0.834992	0.197282			1.57098	0.321039	0.0545984	0.0211114	1.03227	1.96773	0.191114	0.169681	0.0386516	2.08087	interior	14
3861	0.831163	0.17902	0.0220223		1.58702	0.318257	0.0483069	0.0142079	1.0322	1.9678	0.177215	0.16704	0.0387464	1.83576	interior	15
3831	0.76128	0.254953	0.0537121		1.52686	0.325137	0.0572929	0.0207687	1.06995	1.93005	0.250881	0.175561	0.0918783	2.20583	CRUST	16
3833	0.814778	0.203694	0.0554169		1.51423	0.36021	0.0336995	0.017973	1.07389	1.92611	0.2	0.192169	0.0906863	1.29352	CRUST	17
3834	0.736581	0.295229	0.0499503		1.51267	0.344433	0.0417495	0.0193837	1.08176	1.91824	0.286127	0.185468	0.110999	1.62191	CRUST	18
3835	0.791916	0.222305	0.0591317		1.5262	0.345808	0.0329341	0.0217066	1.07335	1.92665	0.219188	0.184726	0.0926276	1.26557	CRUST	19
3836	0.646033	0.38934	0.0200765		1.56597	0.317639	0.0516252	0.00932122	1.05545	1.94455	0.376039	0.168633	0.0858306	2.02639	CRUST	20
3837	0.625693	0.438287			1.56574	0.309068	0.0460957	0.0151134	1.06398	1.93602	0.411932	0.164853	0.102254	1.82164	CRUST	21
3840	0.688571	0.361429			1.56857	0.325714	0.0392857	0.0164286	1.05	1.95	0.344218	0.171946	0.0726141	1.53703	CRUST	22
3841	0.757149	0.248525	0.0224694		1.58852	0.333636	0.0347254		1.02814	1.95688	0.247123	0.173574	0.0569544	1.34351	CRUST	23
3843	0.683003	0.38677			1.54491	0.342588	0.0267986	0.0159343	1.06977	1.93023	0.361544	0.181504	0.102156	1.05547	CRUST	24
3844	0.568507	0.640217			1.44234	0.307541	0.0273534	0.0140463	1.20872	1.79128	0.529664	0.17575	0.367143	1.11976	CRUST	25
