# Supplementary material for: Chromites in ordinary-chondrite fusion crusts
Source: Copernicus journal article supplement (doi:10.5194/ejm-37-617-2025), 2025-09-10
Supplement: Supplementary file 1 [file ejm-37-617-2025-supplement.zip]

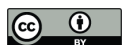

## *Supplement of*

# **Chromites in ordinary-chondrite fusion crusts**

**Manlio Bellesi et al.**

*Correspondence to:* Gabriele Giuli ([gabriele.giuli@unicam.it](mailto:gabriele.giuli@unicam.it))

- [ejm-37-617-2025-supplement-title-page.pdf](#)
- [Table\\_S1.xlsx](#)

The copyright of individual parts of the supplement might differ from the article licence.
